# Supplementary material
Source: PubMed Central journal article supplement (PMC5554935)
Supplement: NIHMS859234-supplement-Table_S1.pdf [file NIHMS859234-supplement-Table_S1.pdf]

**Table S1. Serum amino acid profile**

| Amino acid          | <i>Slc7a5<sup>fl/+</sup>;Tie2<sup>Cre</sup></i> | <i>Slc7a5<sup>fl/fl</sup>;Tie2<sup>Cre</sup></i> |
|---------------------|-------------------------------------------------|--------------------------------------------------|
| 4-AMINOBUTYRIC ACID | 0,71 +/- 0,12                                   | 0,45 +/- 0,25                                    |
| 4-HYDROXYPROLINE    | 15,96 +/- 2,79                                  | 11,77 +/- 5,94                                   |
| ALANINE             | 837,42 +/- 161,14                               | 648,79 +/- 91,05                                 |
| ARGININE            | 172,17 +/- 84,57                                | 137,68 +/- 16,67                                 |
| ASPARAGINE          | 37,98 +/- 11,83                                 | 31,15 +/- 7,23                                   |
| ASPARTIC ACID       | 14,57 +/- 5,79                                  | 9,65 +/- 1,83                                    |
| CITRULLINE          | 104,9 +/- 13,13                                 | 97,42 +/- 10,97                                  |
| CYSTINE             | 5,15 +/- 1,81                                   | 2,12 +/- 0,55                                    |
| GLUTAMIC ACID       | 125,52 +/- 36,6                                 | 124,86 +/- 39,36                                 |
| GLUTAMIN            | 1072,97 +/- 191,3                               | 1063,33 +/- 194,95                               |
| GLYCINE             | 440,03 +/- 55,91                                | 402,34 +/- 47,3                                  |
| HISTIDINE           | 84,98 +/- 9,92                                  | 82,67 +/- 7,19                                   |
| ISOLEUCINE          | 81,69 +/- 19,26                                 | 85,29 +/- 9,76                                   |
| LEUCINE             | 170,93 +/- 40,01                                | 173,66 +/- 14,88                                 |
| LYSINE              | 387,39 +/- 81,18                                | 346,79 +/- 42,39                                 |
| METHIONINE          | 76,58 +/- 17,9                                  | 63,54 +/- 8,17                                   |
| ORNITHINE           | 105,02 +/- 33,1                                 | 68,11 +/- 8,79                                   |
| PHENYLALANINE       | 104,88 +/- 25,57                                | 98,44 +/- 7,53                                   |
| PROLINE             | 155,95 +/- 67,36                                | 96,76 +/- 20,59                                  |
| SERINE              | 201,36 +/- 36,26                                | 199,09 +/- 29,73                                 |
| THREONINE           | 194,8 +/- 56,9                                  | 175,1 +/- 28,61                                  |
| THYROSINE           | 100,41 +/- 26,39                                | 84,72 +/- 18,65                                  |
| TRYPTOPHAN          | 118,39 +/- 33,66                                | 116,48 +/- 23,42                                 |
| VALINE              | 305,33 +/- 77,64                                | 266,69 +/- 24,86                                 |
