# Supplementary material
Source: PubMed Central journal article supplement (PMC5554935)
Supplement: NIHMS859234-supplement-Table_S2.pdf [file NIHMS859234-supplement-Table_S2.pdf]

**Table S2. Segregating, rare variants discovered in the affected individuals using whole-exome sequencing.**

| Family             | Chr | Position  | Ref Allele | Mut Allele | Gene          | Function         | AA Change | AA Position | Conservation                                                            | Allele Frequency | phast Cons | GERP   |
|--------------------|-----|-----------|------------|------------|---------------|------------------|-----------|-------------|-------------------------------------------------------------------------|------------------|------------|--------|
| <b>Family 1426</b> |     |           |            |            |               |                  |           |             |                                                                         |                  |            |        |
|                    | 16  | 87874689  | G          | A          | SLC7A5        | missense         | ALA/VAL   | 246/508     | AAAAAAA-<br>AAAAAAA-AA-<br>AAAAAAA-AA-A-<br>AAAAA-AAAAAAA               | 0.001            | 1          | 4.72   |
| <b>Family 1465</b> |     |           |            |            |               |                  |           |             |                                                                         |                  |            |        |
|                    | 2   | 111542319 | CA         | C          | ACOXL         | frameshift       | T29       | 29/580      | TTTTTTTT-TTT-<br>TT-TRTRRTTTT-<br>KTKM-TKK-----<br>--                   | 0.0004           | 0.261      | 0.185  |
|                    | 16  | 89986498  | A          | G          | MC1R<br>TUBB3 | missense         | K278E     | 278/317     | KK-KKKKK-/-<br>KKQK-<br>RK/KQKKQK-KK-<br>KK-K-<br>QQ/SSSNYRSRR<br>R-/-- | 0.013            | 0.93       | -0.119 |
|                    | 22  | 25131681  | G          | T          | PIWIL3        | missense         | A543E     | 543/882     | AAAAAA---/PAAG-<br>---/-A---A---PA-----<br>/---AA-A-AA-/PG              | 0.0064           | 0.004      | 0.716  |
|                    | 22  | 24226213  | T          | C          | SLC2A1<br>1,  | splice_<br>donor | R259Q     | 259/496     | RX-R--WLW/R--R-<br>RWL/-R--RRR-Q-<br>RR-R---/----<br>KKKKKE-/--         | 0.0026           | 1          | 1.57   |
|                    | 16  | 87871467  | G          | A          | SLC7A5        | missense         | P375L     | 375/508     | PPPPP--P/-PP---<br>P/PPPPPPPPP-<br>PP-P-PP/PPP-<br>PPPPPPP/PP           | 0.0003           | 1          | 4.79   |
