# Supplementary material
Source: PubMed Central journal article supplement (PMC5554935)
Supplement: NIHMS859234-supplement-Table_S3.pdf [file NIHMS859234-supplement-Table_S3.pdf]

**Table S3. Plasma amino acid levels from members of family 1426.**

| <b>Amino Acid</b>         | <b>1426-12 (U)</b> | <b>1426-6 (A)</b> | <b>Normal range (2-18 years old)</b> |
|---------------------------|--------------------|-------------------|--------------------------------------|
| <b>Glycine</b>            | 226.1              | 215.9             | 127-341                              |
| <b>Ornithine</b>          | 22.7               | 15.1              | 10-163                               |
| <b>Arginine</b>           | 0.9                | 0.5               | 10-140                               |
| <b>Citrulline</b>         | 10.2               | 11.7              | 1-46                                 |
| <b>Alanine</b>            | 601.1              | 579.3             | 152-547                              |
| <b>Serine</b>             | 189.4              | 202.2             | 69-187                               |
| <b>Valine</b>             | 219.1              | 164.0             | 74-321                               |
| <b>Threonine</b>          | 48.7               | 50.4              | 35-226                               |
| <b>Leucine+Isoleucine</b> | 189.3              | 148.8             | N.A.                                 |
| <b>Methionine</b>         | 20.1               | 18.6              | 7-47                                 |
| <b>Histidine</b>          | 71.5               | 46.0              | 41-125                               |
| <b>Phenylalanine</b>      | 71.9               | 58.4              | N.A.                                 |
| <b>Tyrosine</b>           | 57.6               | 51.0              | 24-115                               |
| <b>Aspartate</b>          | 7.7                | 23.0              | 1-24                                 |
| <b>Glutamate</b>          | 59.7               | 131.1             | 5-150                                |

Plasma amino acids were quantified on bloodspot cards by FIA-MS or LC-MS/MS at the Mayo Clinic (Novarino et al. 2012). U, unaffected; A, affected. Values are expressed in nmol/ml.
