# Supplementary material
Source: PubMed Central journal article supplement (PMC5554935)
Supplement: NIHMS859234-supplement-Table_S4.pdf [file NIHMS859234-supplement-Table_S4.pdf]

**Table S4. Brain amino acid levels after leucine and isoleucine i.c.v. administration**

|                  | <i>Slc7a5<sup>fl/fl</sup></i> | <i>Tie2<sup>Cre</sup>;Slc7a5<sup>fl/fl</sup></i> |
|------------------|-------------------------------|--------------------------------------------------|
| GLUTAMIN         | 1 ± 0.51                      | 1.25 ± 0.20                                      |
| CITRULLINE       | 1 ± 0.21                      | 1.07 ± 0.15                                      |
| SERINE           | 1 ± 0.39                      | 2.66 ± 0.25 **                                   |
| 4-HYDROXYPROLINE | 1 ± 0.55                      | 0.96 ± 0.13                                      |
| GLYCINE          | 1 ± 0.36                      | 2.07 ± 0.18 **                                   |
| THREONINE        | 1 ± 0.53                      | 2.25 ± 0.14 **                                   |
| GABA             | 1 ± 0.32                      | 0.88 ± 0.08                                      |
| PROLINE          | 1 ± 0.22                      | 1.58 ± 0.11 **                                   |
| HISTIDINE        | 1 ± 0.55                      | 4.51 ± 0.60 **                                   |
| VALINE           | 1 ± 0.32                      | 0.94 ± 0.11                                      |
| TRYPTOPHAN       | 1 ± 0.37                      | 2.25 ± 0.43 **                                   |
| PHENYLALANINE    | 1 ± 0.31                      | 2.01 ± 0.15 **                                   |
| LEUCINE          | 1 ± 0.23                      | 0.96 ± 0.13                                      |
| ISOLEUCINE       | 1 ± 0.25                      | 1.09 ± 0.17                                      |
| THYROSINE        | 1 ± 0.33                      | 2.17 ± 0.18 **                                   |

Relevant brain amino acid were measured by HPLC. Levels measured in the mutant mice were normalized on control levels.
