# Supplementary material
Source: PubMed Central journal article supplement (PMC5554935)

# Figure S1

A

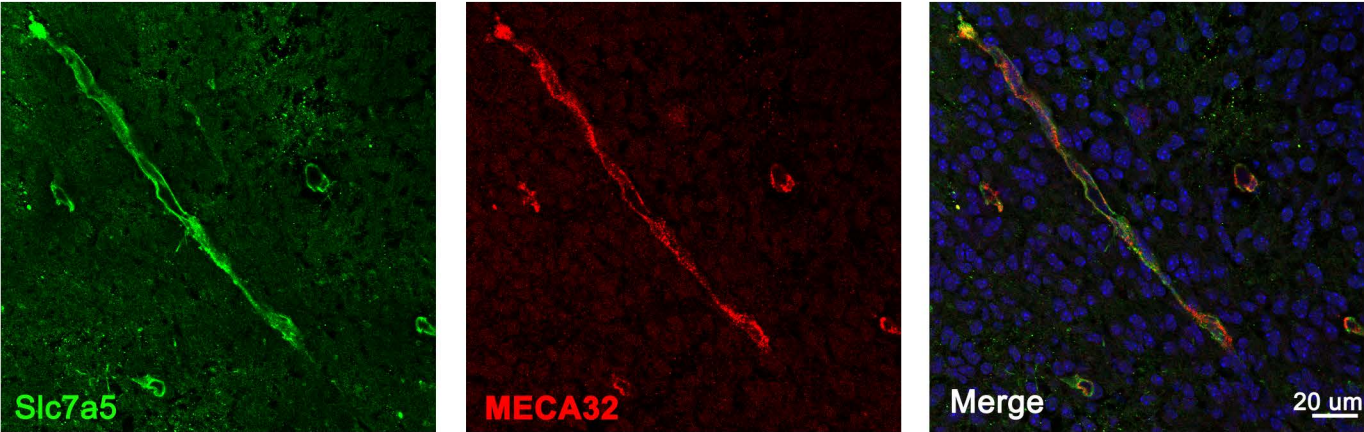

B

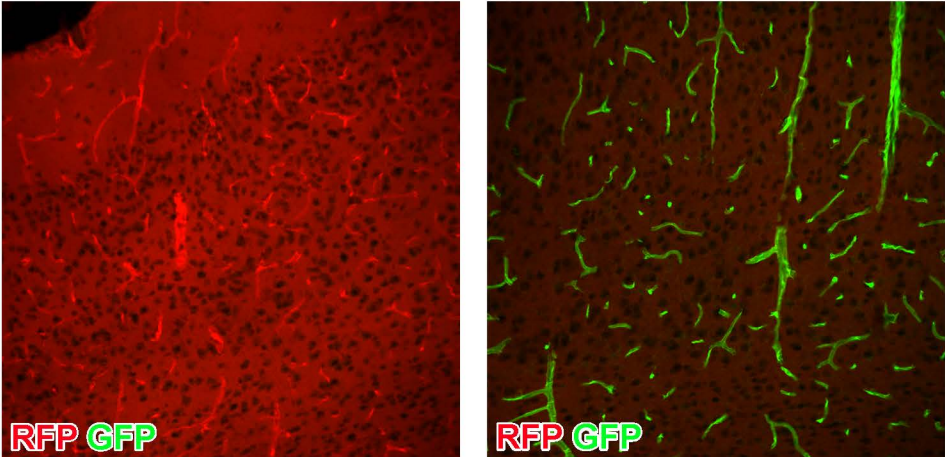

Figure S2

A

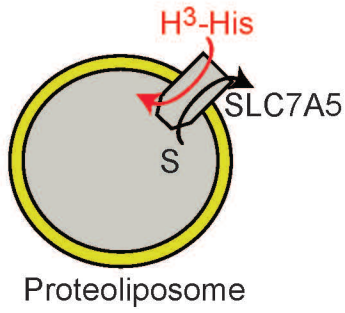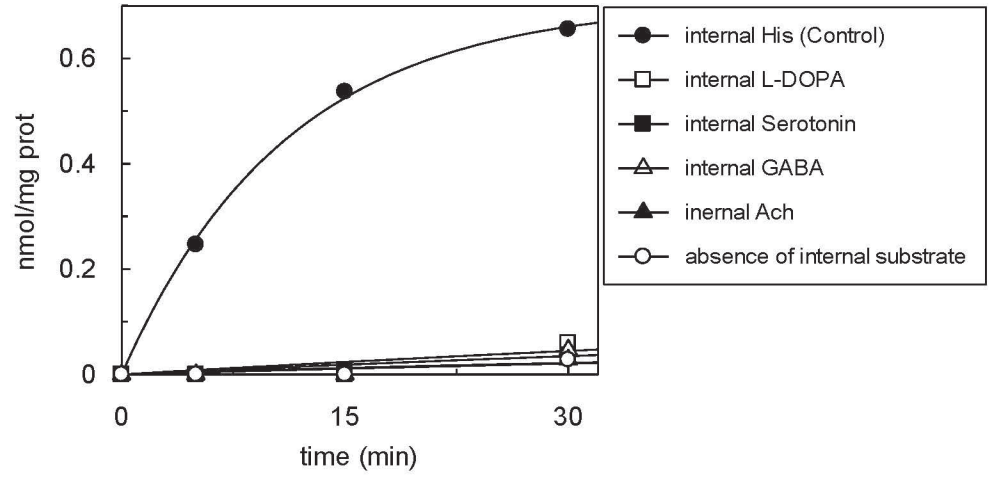

B

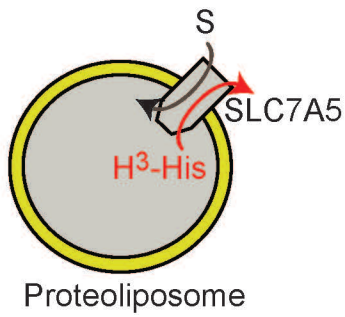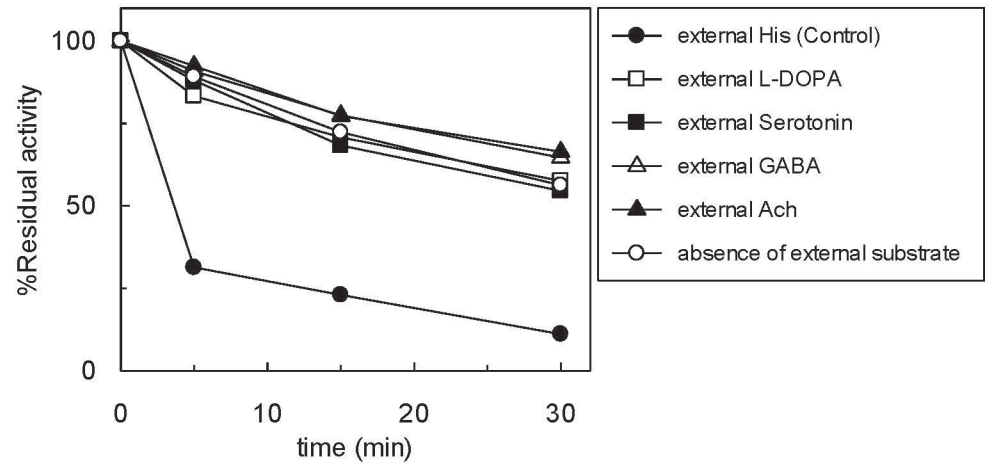

C

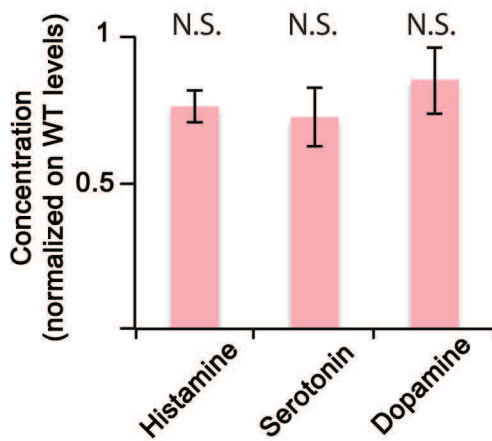

Figure S3

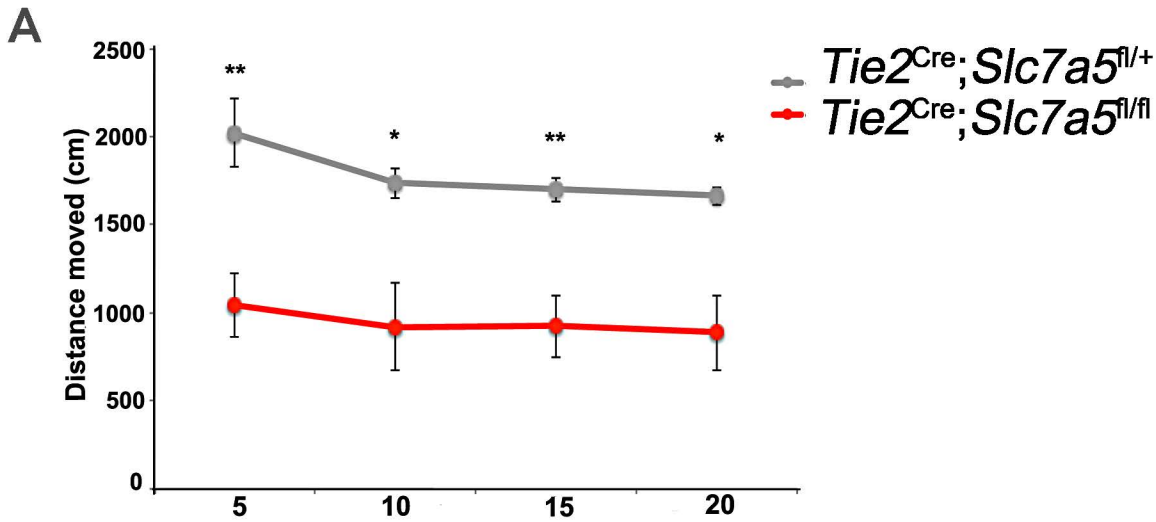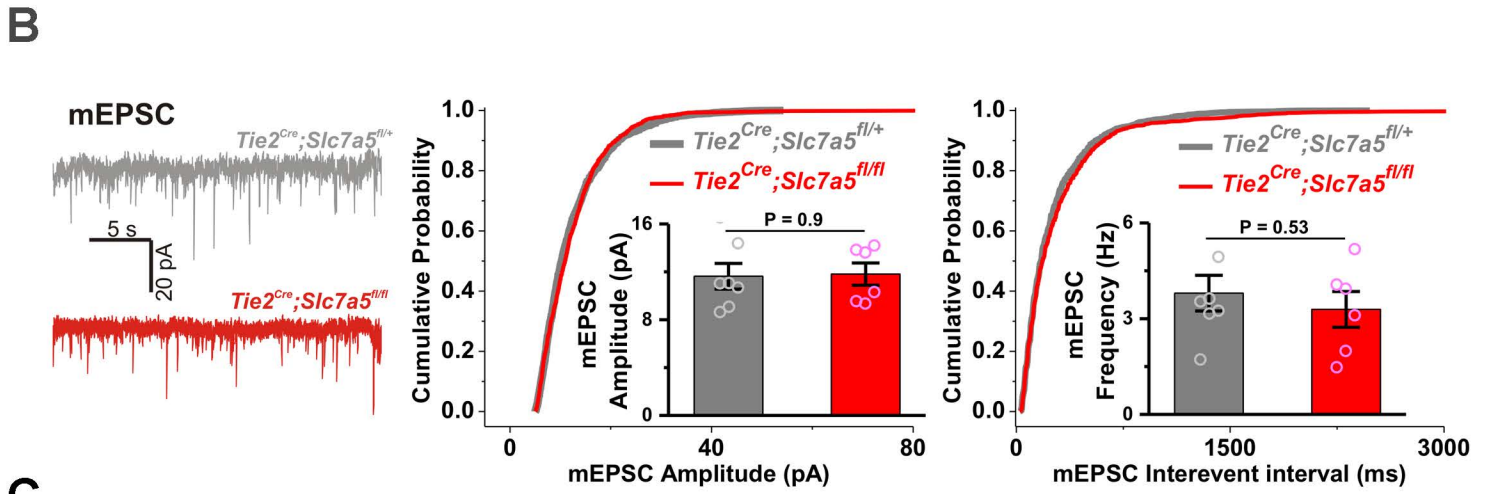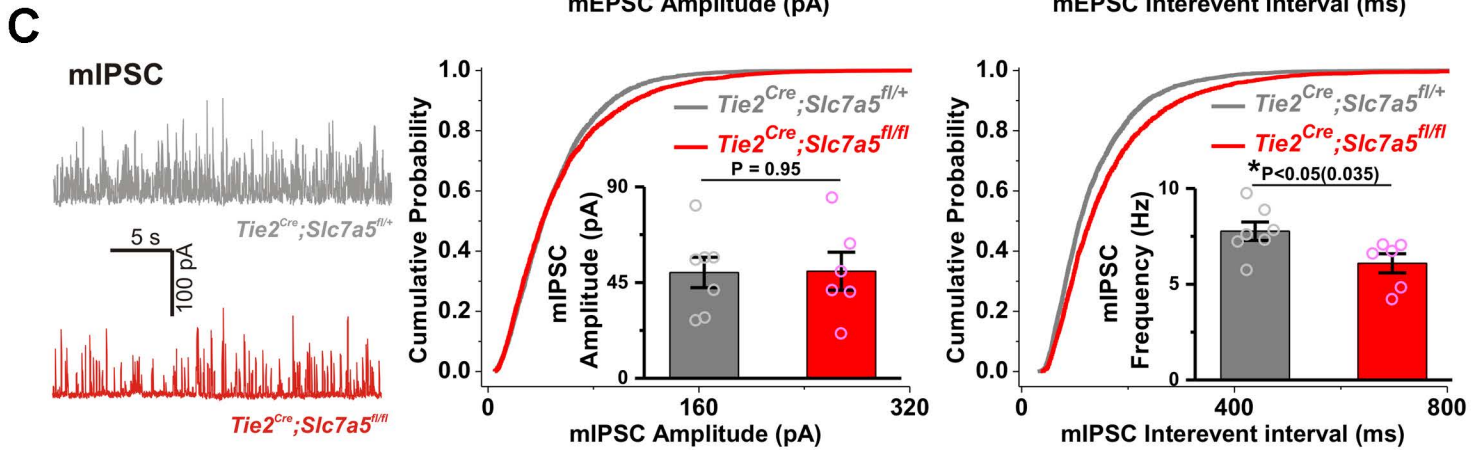

# Figure S4

**A**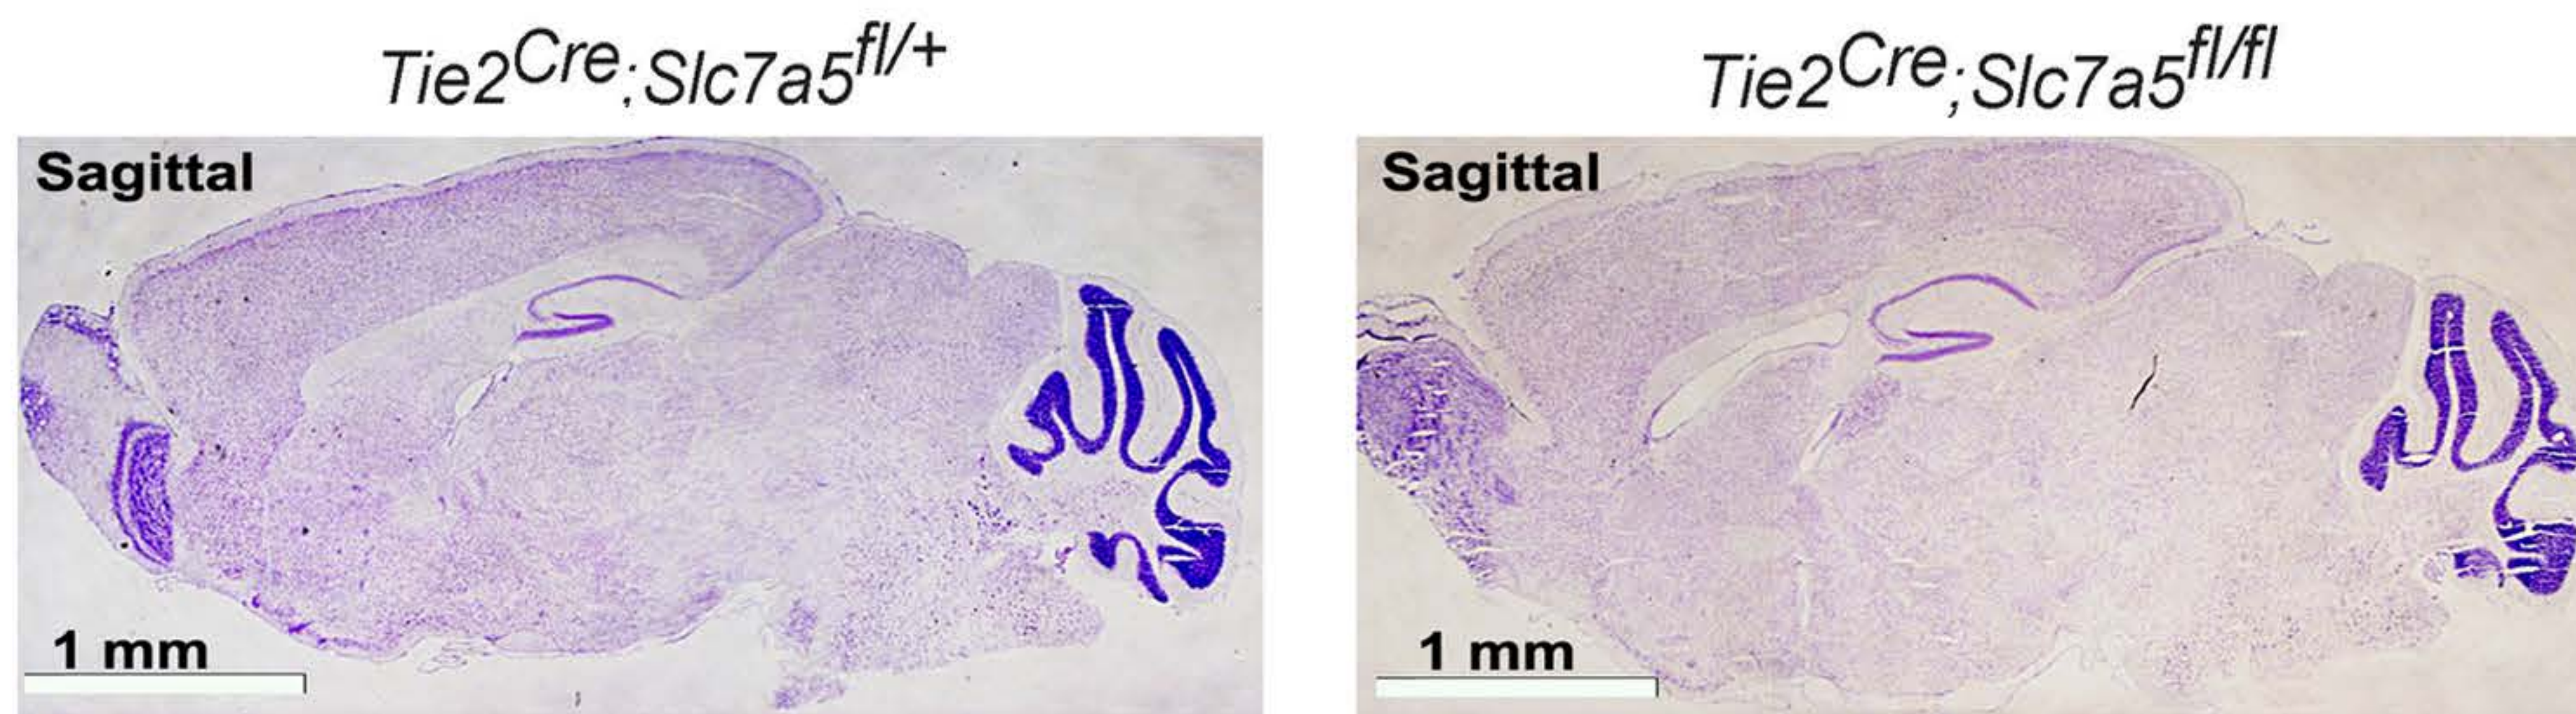**B**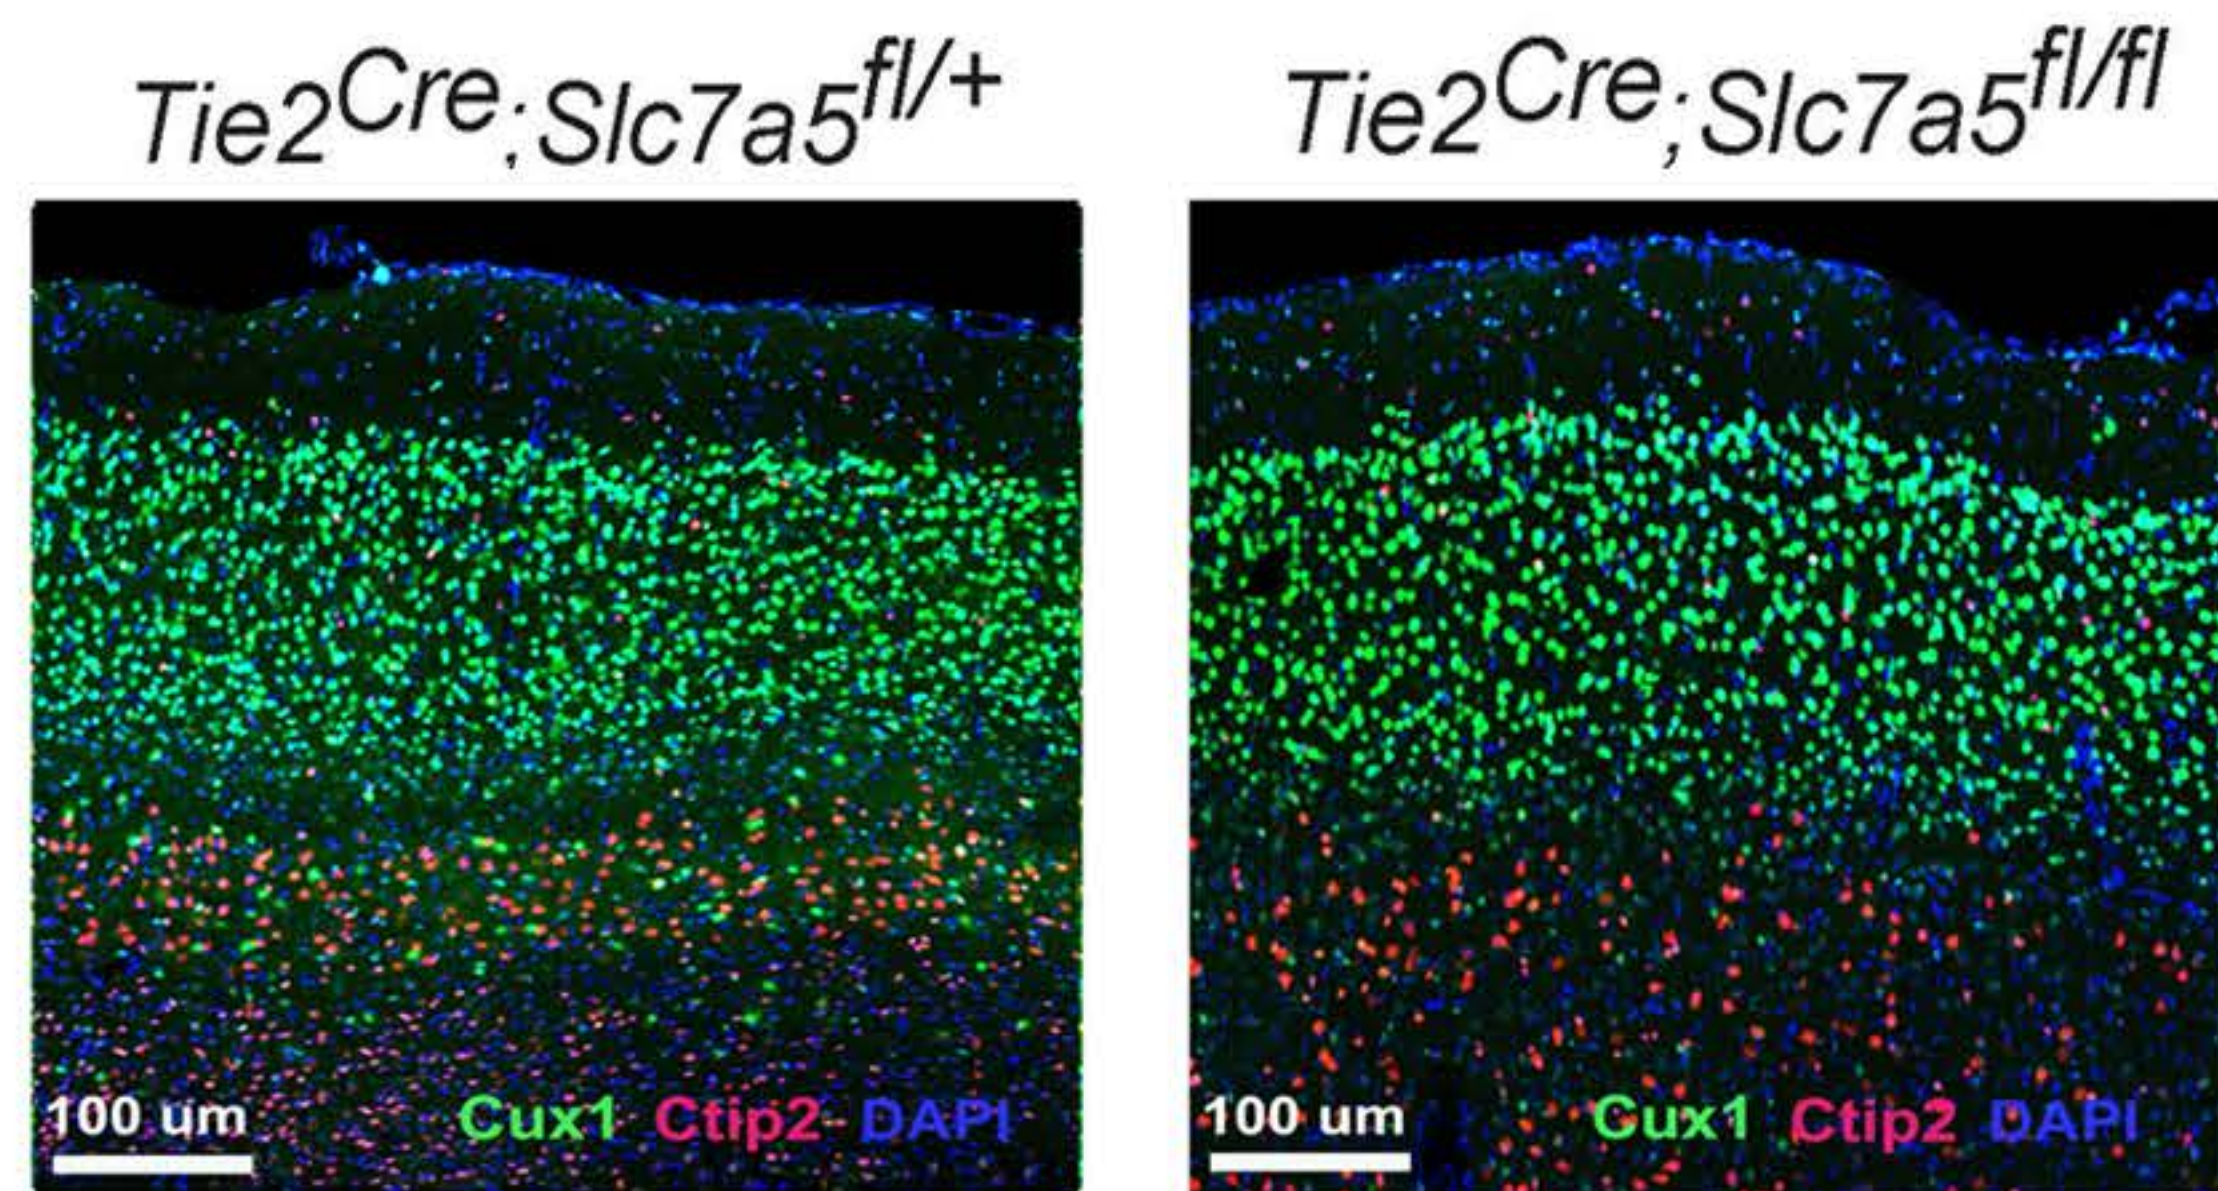**C**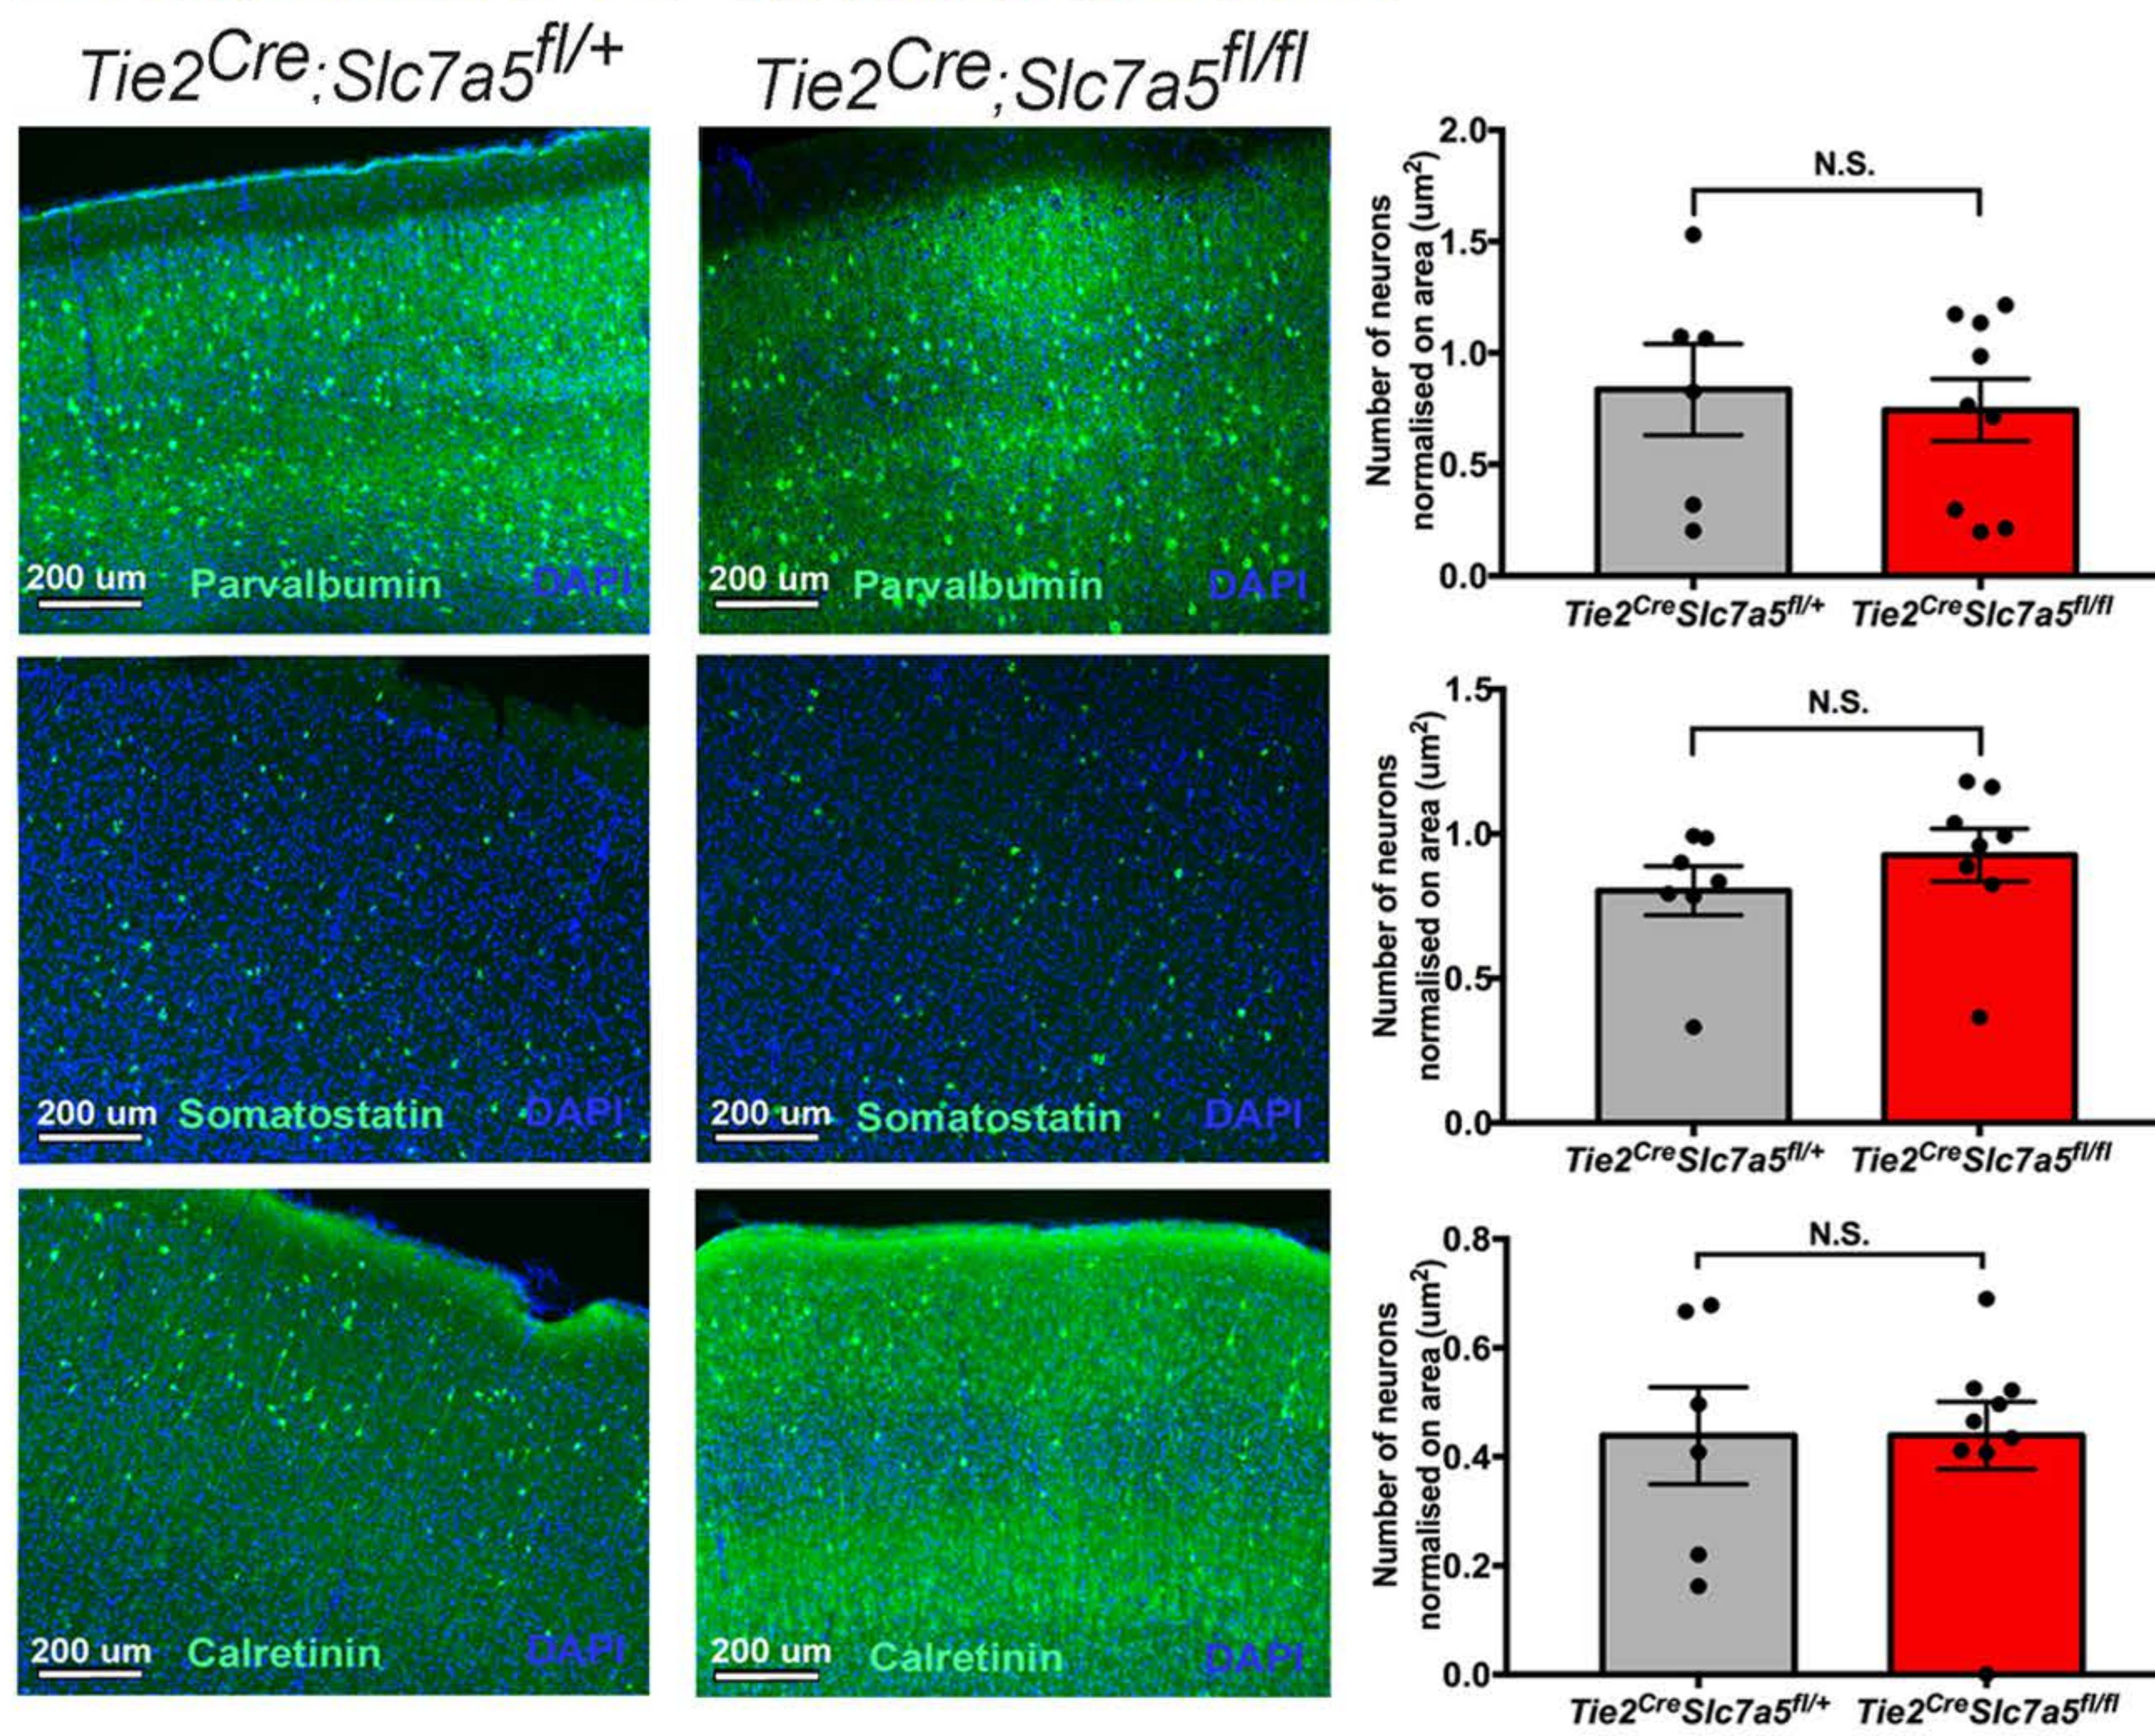

**Figure S5**

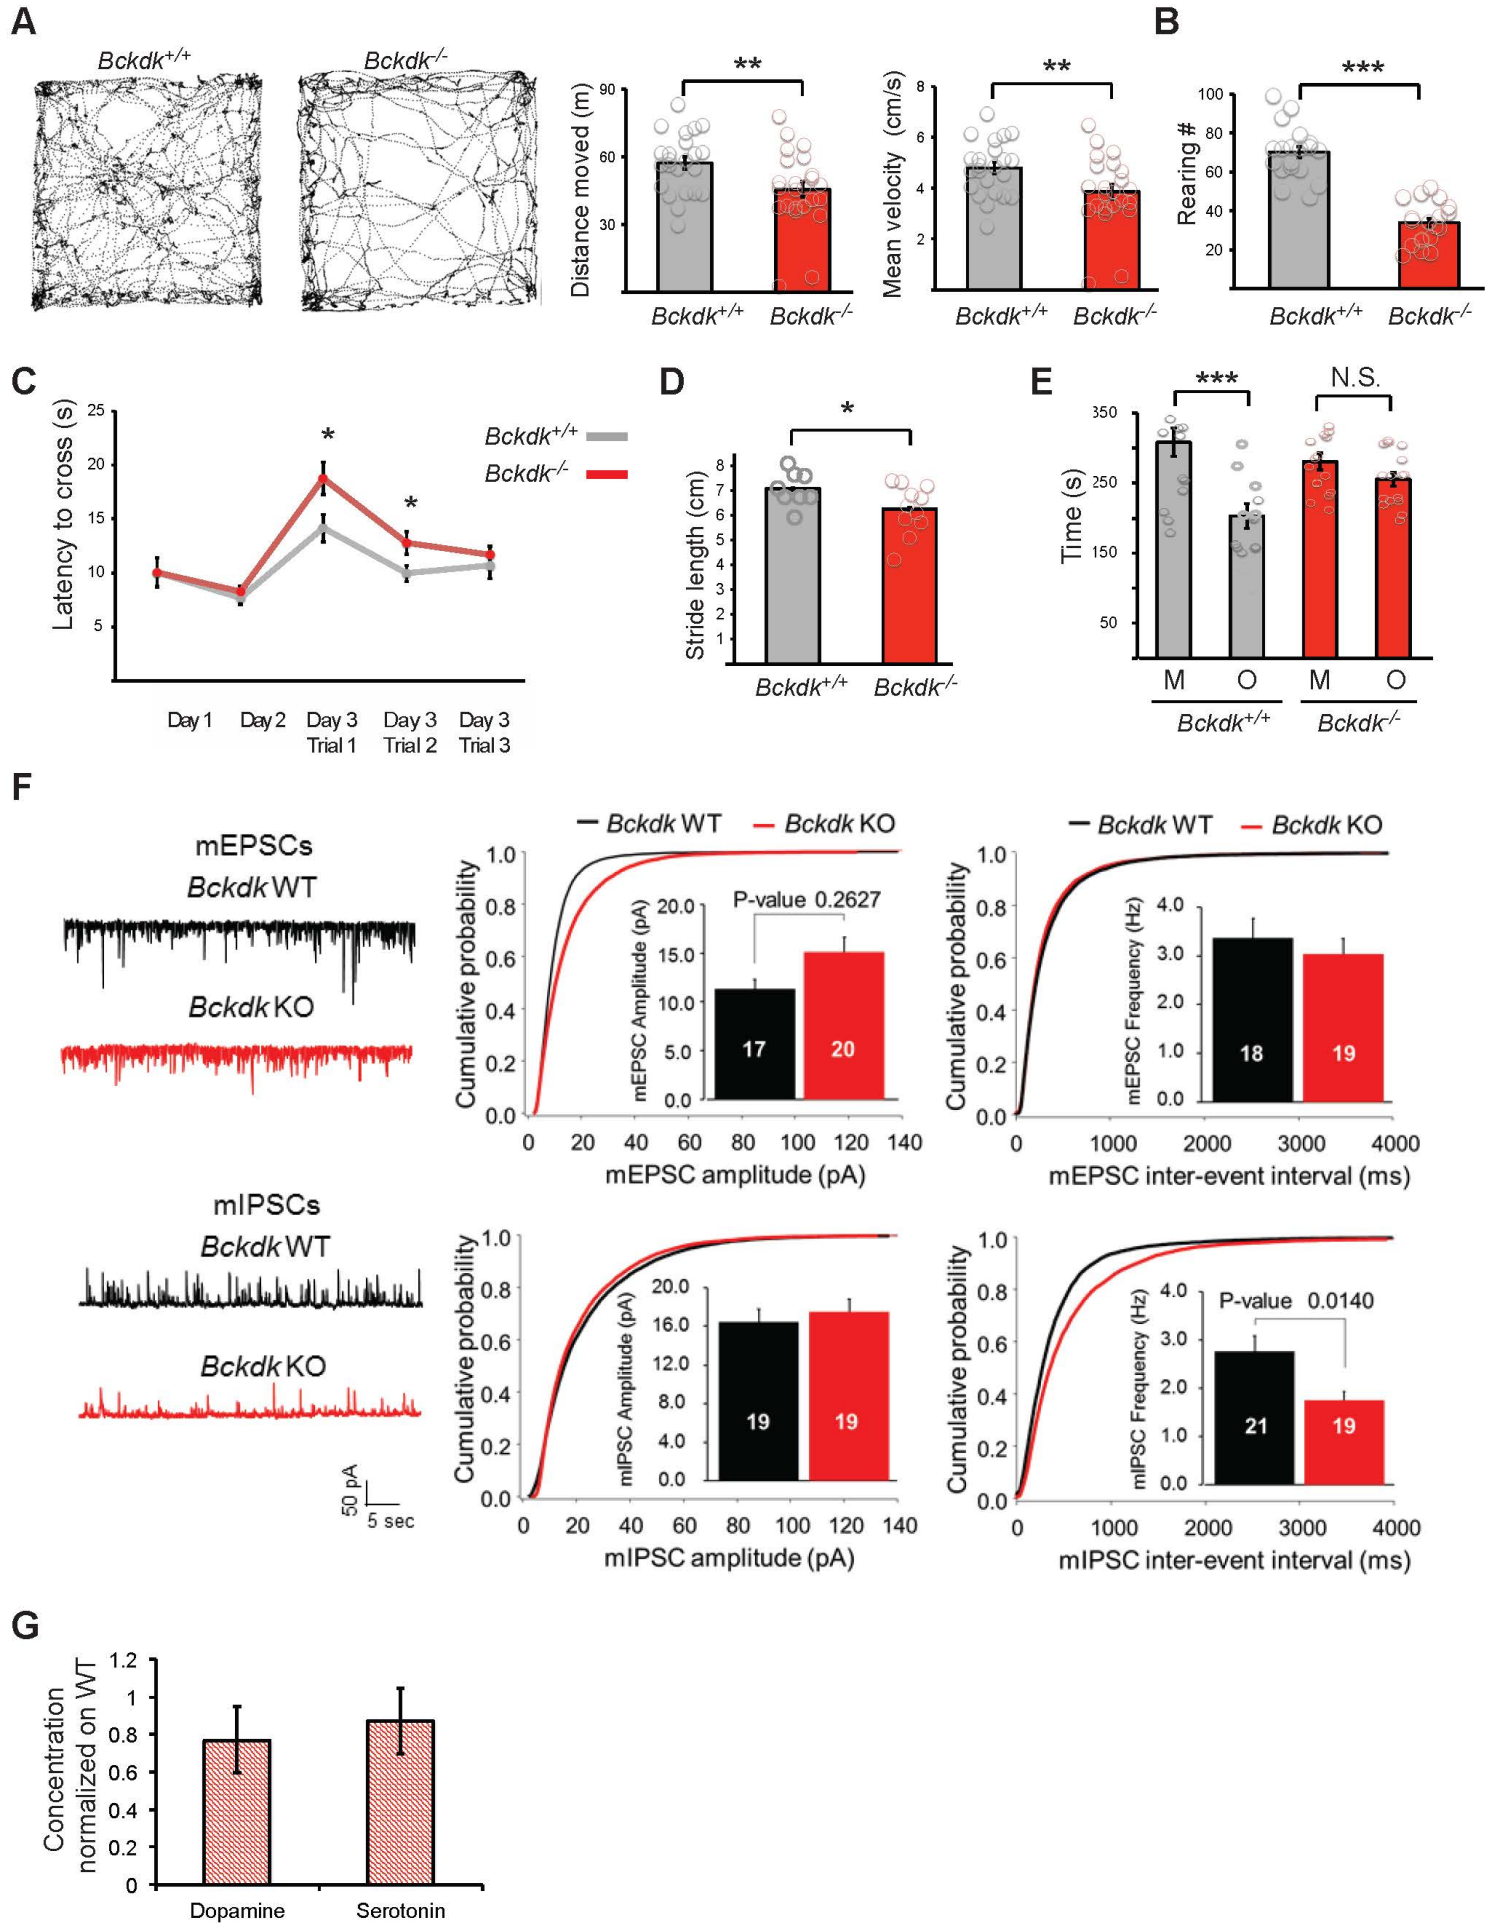

# Figure S6

## Family 1426

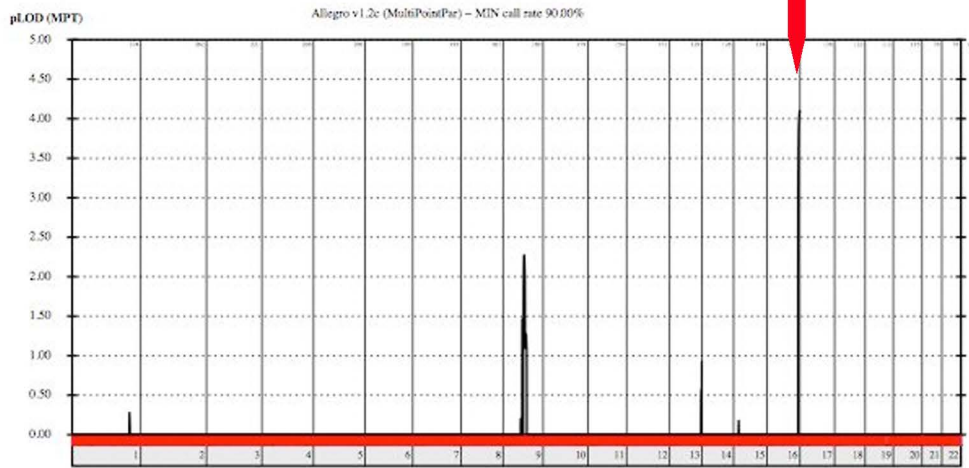

## Family 1465

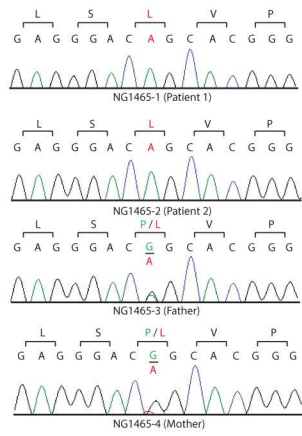

# Figure S7

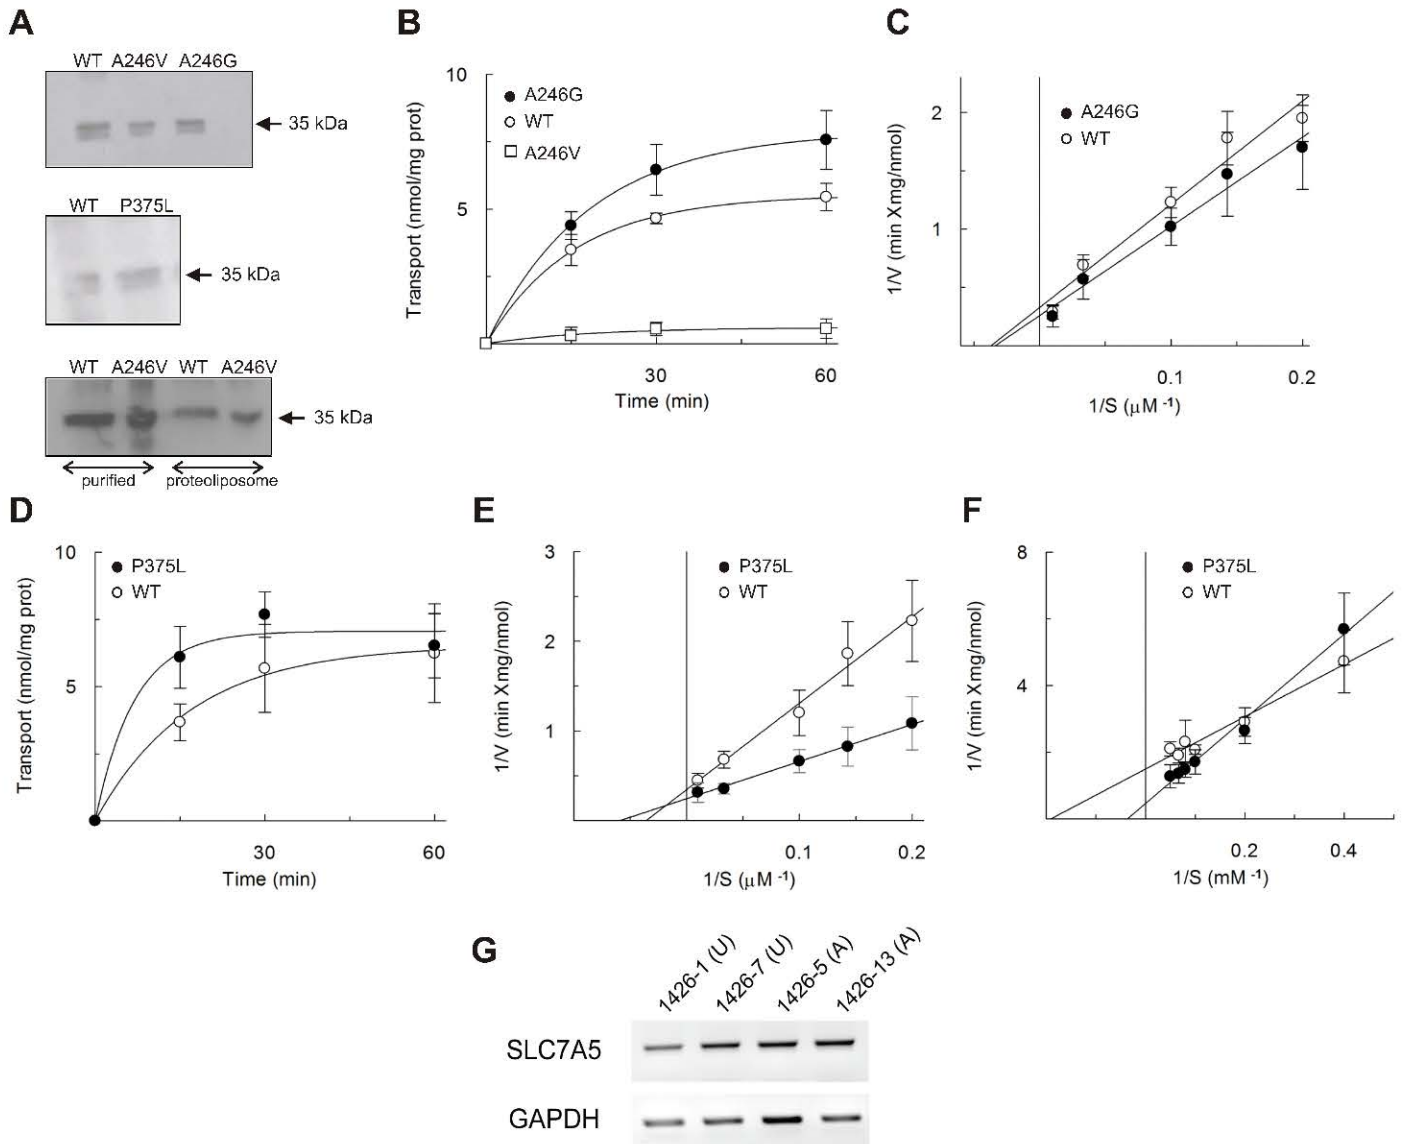

Supplement: NIHMS859234-supplement-Supp_Figs.pdf [file NIHMS859234-supplement-Supp_Figs.pdf]
